# Supplementary material for: Hydrologic controls on DOC, As and Pb export from a polluted peatland – the importance of heavy rain events, antecedent moisture conditions and hydrological connectivity
Source: Copernicus journal article supplement (doi:10.5194/bg-12-4651-2015), 2015-08-06
Supplement: Supplementary file [file bg-12-4651-2015-supplement.pdf]

Supplement of Biogeosciences, 12, 4651–4664, 2015  
<http://www.biogeosciences.net/12/4651/2015/>  
doi:10.5194/bg-12-4651-2015-supplement  
© Author(s) 2015. CC Attribution 3.0 License.

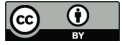

*Supplement of*

## **Hydrologic controls on DOC, As and Pb export from a polluted peatland – the importance of heavy rain events, antecedent moisture conditions and hydrological connectivity**

**T. Broder and H. Biester**

*Correspondence to:* T. Broder (t.broder@tu-bs.de)

The copyright of individual parts of the supplement might differ from the CC-BY 3.0 licence.

**Table S1:** As and Pb concentrations of the 30 cm short peat cores used for inventory calculations.

Concentrations were determined on sample aliquots of the upper (0-15 cm depth) and lower part (15 - 30 cm depth) of each core.

| Core | As [mg kg <sup>-1</sup> ] |          | Pb [mg kg <sup>-1</sup> ] |          |
|------|---------------------------|----------|---------------------------|----------|
|      | 0-15 cm                   | 15-30 cm | 0-15 cm                   | 15-30 cm |
| 1    | 48.74                     | 23.90    | 1463.78                   | 478.58   |
| 2    | 52.40                     | 8.78     | 1030.13                   | 45.40    |
| 3    | 70.22                     | 17.77    | 2097.97                   | 182.20   |
| 4    | 52.08                     | 32.47    | 965.09                    | 496.84   |
| 5    | 16.54                     | 42.78    | 229.56                    | 697.67   |
| 6    | 19.96                     | 45.70    | 198.71                    | 767.60   |
| 7    | 20.98                     | 39.52    | 232.31                    | 446.55   |
| 8    | 3.64                      | 27.84    | 23.16                     | 281.85   |
| 9    | 27.24                     | 44.76    | 320.88                    | 734.68   |
| 10   | 35.99                     | 48.02    | 568.28                    | 903.72   |
| 11   | 21.66                     | 27.05    | 397.32                    | 472.32   |
| 12   | 34.41                     | 51.96    | 839.34                    | 1285.92  |
| 13   | 23.84                     | 53.40    | 280.36                    | 736.18   |
| 14   | 3.61                      | 25.51    | 16.57                     | 240.64   |
| 15   | 5.70                      | 28.90    | 47.14                     | 427.62   |

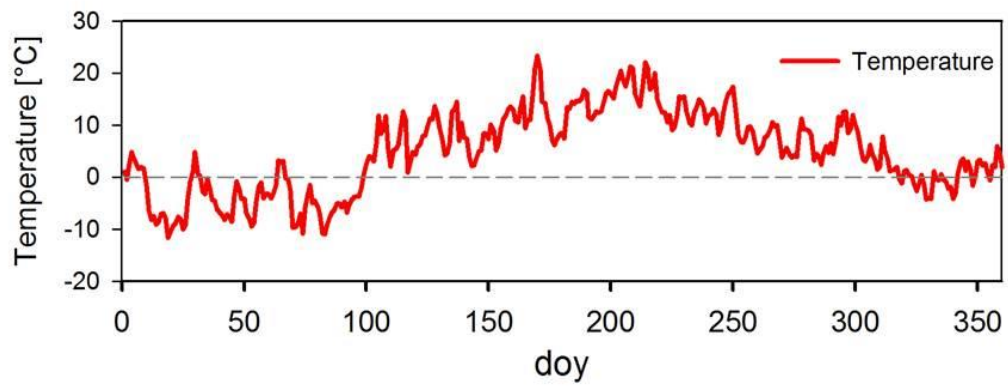

**Figure S1:** Annual temperature record at the Odersprung bog in 2013. Gray dashed line highlights 0°C line.
